# Supplementary material
Source: Atypon-hosted journal article supplement (https://615.library.nashville.org/Record/CARL0000824060/DownloadSupplementalFile?fileId=63)
Supplement: DownloadSupplementalFile [file DownloadSupplementalFile]

**Fred Russell Baseball Biography Files**  
**ca. 1920-1998 (bulk 1940-1965)**

**Collection Summary**

**Creator:** Fred Russell

**Title:** Fred Russell Baseball Biography Files

**Inclusive Dates:** ca. 1920-1998 (bulk 1940-1965)

**Summary/Abstract:** This collection contains photographs, negatives, printing plates, copies of newspaper clippings and a small quantity of miscellaneous documents compiled by and for Fred Russell during his time as sports reporter and sports editor for the *Nashville Banner* newspaper. Items date from circa 1920-1998 (bulk 1940-1965).

**Physical Description/Extent:** 6 cu. ft.

**Linking Entry Complexity Note:** Forms part of the *Nashville Banner* Archives

**Accession Number:** Acc. RT-381

**Language:** English

**Stack Location:** Closed stacks NR workroom range 7 sections 6-8

**Repository:** Special Collections Division, Nashville Public Library, 615 Church Street, Nashville, TN 37219

**Chronology**

|               |                                                                                                                                    |
|---------------|------------------------------------------------------------------------------------------------------------------------------------|
| 1906, Aug. 27 | Fred McFerrin Russell born in Nashville, Tennessee                                                                                 |
| 1927          | graduated from Vanderbilt University Law School                                                                                    |
| 1929          | joined the <i>Nashville Banner</i> newspaper                                                                                       |
| 1930          | named sports editor at the <i>Nashville Banner</i> newspaper                                                                       |
| 1930          | began writing sports column, "Sideline Sidelights." Over the years, wrote more than 12,000 columns for the <i>Nashville Banner</i> |
| 1935          | wrote the book: <i>50 Years of Vanderbilt Football</i>                                                                             |
| 1944          | wrote the book: <i>I'll Go Quietly</i>                                                                                             |
| 1945          | wrote the book: <i>I'll Try Anything Twice</i>                                                                                     |
| 1948          | wrote the book: <i>Funny Thing About Sports</i>                                                                                    |
| 1949-1962     | wrote the annual article: "Pigskin Preview" for the <i>Saturday Evening Post</i>                                                   |
| 1950          | wrote the book: <i>Vol Fest: Records, History, and Tales of the Nashville Baseball Club in the Southern Association 1901-1950</i>  |
| 1955          | named vice-president of <i>Nashville Banner</i>                                                                                    |
| 1955          | awarded the Grantland Rice Memorial Award from the Sportsmanship Brotherhood                                                       |
| 1957          | wrote the book: <i>Bury Me in an Old Press Box</i>                                                                                 |
| 1963          | wrote the book: <i>Big Bowl Football</i>                                                                                           |
| 1969          | named sports director of <i>Nashville Banner</i>                                                                                   |
| 1974          | inducted into the Tennessee Sports Hall of Fame                                                                                    |

|               |                                                                         |
|---------------|-------------------------------------------------------------------------|
| 1984          | received the Red Smith Award from the Associated Press editors          |
| 1988          | inducted into the National Sportscasters and Sportswriters Hall of Fame |
| 1998          | <i>Nashville Banner</i> newspaper ceased publication.                   |
| 1998          | Russell began writing a weekly column for <i>The Tennessean</i>         |
| 1999          | Russell retired                                                         |
| 2003, Jan. 26 | Fred Russell dies, age 96 in Nashville, Tennessee                       |

### **Biographical/Historical Sketch**

Fred McFerrin Russell was born on August 27, 1906 to Mabel Lee McFerrin and John E. Russell. Raised in Wartrace, Tennessee, Russell attended Vanderbilt University Law School, after briefly practicing law; he joined the *Nashville Banner* newspaper as a sports writer in 1929. Russell was named sports editor in 1930 and went on to be the vice-president of the paper in 1955 and was later named sports director in 1969. In 1981 Russell became sports writer emeritus working at the *Nashville Banner* until it ceased publication in 1998.

From 1949-1962, Russell wrote the "Pigskin Preview" for the *Saturday Evening Post* predicting the best teams in college football. He also wrote several books about sports and his life as a sports writer. They include: *Fifty Years of Vanderbilt Football* (1938), *I'll Go Quietly* (1944), *I'll Try Anything Twice* (1945), *Funny Thing About Sports* (1948), *Vol Fest: Records, History, and Tales of the Nashville Baseball Club in the Southern Association 1901-1950* (1950), *Big Bowl Football* (1963) and the autobiographical *Bury Me in an Old Press Box* (1957).

Russell received many honors. He was awarded the Grantland Rice Memorial Award in 1955, was inducted into the Tennessee Sports Hall of Fame in 1974 and the National Sportscasters and Sportswriters Hall of Fame in 1988. Fred Russell died at the age of 96 on January 26, 2003 in Nashville, Tennessee and is buried at Mt. Olivet Cemetery.

### **Scope and Contents of the Collection**

Compiled by Fred Russell during his time as a sports reporter and editor at the *Nashville Banner* newspaper, the Fred Russell Baseball Biography Files contain 693 black and white photographs of local minor league baseball players primarily from the Nashville Vols. Major league players are also represented.

The collection is arranged alphabetically by the player's last name. The materials date from 1920-1998, with the bulk of the collection being from 1940-1965. Notable people include Dizzy Dean, Bobby Doerr, Chuck Dressen, Waite Hoyt and Connie Mack. The collection also features photo negatives, printing plates and copies of newspaper clippings about some of the players.

## **Organization/Arrangement of Materials**

**Arrangement:** Alphabetically by last name of ball player.

## **Restrictions**

**Restrictions on Access:** In library use only. Available by appointment.  
Negatives are restricted to staff use only.

**Restrictions on Use and Reproduction:** This material may be protected by copyright law (Title 17 U.S. Code).

## **Index Terms**

### **Personal Names:**

Dean, Dizzy, 1910-1974  
Doerr, Bobby, 1918-2017  
Dressen, Charles (Chuck), 1894-1966  
Hoyt, Waite, 1899-1984  
Mack, Connie, 1862-1956  
Sewell, Truett (Rip), b.1907-  
Sisler, George, 1893-1973

### **Corporate Names/Organizations:**

Major League Baseball (Organization)  
Minor league baseball  
Nashville Banner  
Nashville Vols (Baseball team)  
Southern Association (Baseball league)  
South Atlantic League (Baseball league:1904-1963)

### **Conference Names:**

### **Subjects:**

Baseball--Southern States  
Baseball--Tennessee--Nashville  
Baseball coaches--Southern States  
Baseball players--Southern States  
Baseball players--Tennessee--Nashville  
Baseball teams--Southern States  
Baseball teams--Tennessee--Nashville  
Minor league baseball--Southern States  
Minor league baseball--Tennessee--Nashville

Sports--Southern States  
Sports--Tennessee--Nashville

**Places:**

Nashville (Tenn.)--History--20th century--Sources  
Nashville (Tenn.)--Social life and customs--20th century

**Genre/Document Types:**

Black-and-white negatives  
Black-and-white photographs  
Newspaper clippings  
Printing plates

**Occupations:**

Baseball players

**Associated and Related Material:** The Special Collections Division of the Nashville Public Library also holds the *Nashville Banner* Archives, and the Fred Russell Sports Clippings.

**Separated Material:** Negatives are housed in Image Reproduction.

**Administrative Information**

**Additional Physical Form Available:**

**Location of Originals/Duplicates:**

**Copyright:** Irby C. Simpkins, Jr., and Brownlee O. Currey, Jr. transferred any copyright they held in Nashville Banner materials to the Public Library Board in 2002. However, this collection may contain items for which they did not hold copyright, such as photographs submitted by companies or individuals for publication, or wire service items, and therefore rights were not transferred to the Public Library Board. In either case, items in this collection may be protected by copyright law (Title 17 U.S. Code)

**Preferred Citation:** Fred Russell Baseball Biography Files, Special Collections Division, Nashville Public Library.

**Immediate Source of Acquisition:** The materials came from the original *Nashville Banner* newspaper archive donated to the Nashville Public Library by owners Irby C. Simpkins, Jr. and Brownlee O. Currey, Jr. on February 28, 1999. Mr. Simpkins and Mr. Currey donated the copyright to the donation on November 22, 2002. The Russell Baseball material was in the possession of Metro Archives and transferred to Special Collections sometime in 2015.

**Ownership and Custodial History:** The materials were accumulated by the *Nashville Banner*. However, they were kept separated for use by Fred Russell for

his baseball reporting. They came to the Nashville Public Library along with the rest of the *Nashville Banner* newspaper archive donation in 1999.

**Processing Information:** Processed 2016-2019 by Beth Odle, Special Collections and Rose Mary Reed, volunteer. Cataloged 2019 by Karen Piper.

**Accruals:** No further accruals are expected.

## Other Finding Aids

## Electronic Location and Access

## References to Works by or about Collection Creator/Topic

*Bury Me in an Old Press Box* by Fred Russell

*Life of Dreams: the Good Times of Sportswriter Fred Russell* by Andrew Derr

*Confessions of a Practical Joker: The Wacky Pranks, Gags and Antics of Sport-Writer Freddie Russell & His Entourage* by Jim Harwell

## Detailed Description of the Collection

Photographs and print material are housed together in folders. Printing plates and negatives are housed separately. Negatives are restricted to staff use only. In all cases, the material is arranged alphabetically by the individual ballplayers' last names.

Note: An asterisk (\*) after a player's name indicates an individual connected to the Nashville Vols (player, manager, etc.). An asterisk (\*) after a photo or negative number indicates a player wearing a Vols uniform. The numbers indicate how many items are in that category.

## Container List

| NAME                        | Photographs | Printed information | Negatives staff use only | Printing Plates |
|-----------------------------|-------------|---------------------|--------------------------|-----------------|
| Aaron, Tommie               | 1           |                     |                          |                 |
| Abernathy, Ted              | 3           | 1                   |                          |                 |
| Adams, Ace*                 | 1           | 4                   | 2*                       |                 |
| Adcock, Joe                 | 1           | 3                   |                          |                 |
| Alexander, Dale*            | 1*          | 5                   |                          |                 |
| Alexander, Grover Cleveland | 1           | 2                   |                          |                 |
| Allen, Dick (Richie)        | 2           | 10                  |                          |                 |
| Alou, Jesus                 | 2           |                     |                          |                 |
| Altman, George              | 2           |                     |                          |                 |
| Amoros, Sandy               | 1           | 1                   |                          |                 |

|                           |    |    |    |   |
|---------------------------|----|----|----|---|
| Andrews, Neil*            | 2* |    | 1  |   |
| Appling, Luke             | 2  | 18 |    |   |
| Arroyo, Luis              | 1  | 2  |    |   |
| Ashburn, Richie           | 1  | 3  |    |   |
| Atchley, Jim*             | 1* |    |    |   |
| Averill, Earl*            | 2  | 1  |    |   |
| Bailey, Ed                | 2  |    |    |   |
| Bailey, Jim*              | 1* |    |    |   |
| Baker, Al*                | 1* |    |    |   |
| Baldschum, Jack*          | 2* | 4  |    |   |
| Baldwin, Frank*           | 2* |    |    |   |
| Balser, Ernie*            | 1* |    |    |   |
| Banks, Ernie              | 4  | 12 |    |   |
| Barber, Steve             | 1  | 2  |    |   |
| Barna, Babe (Herbert P.)* | 2* | 1  |    |   |
| Barnes, Junie*            | 1* |    |    |   |
| Baron, Charlie*           | 2* |    |    |   |
| Barrett, Charles (Red)*   | 1* | 2  |    | 1 |
| Bates, Buddy              | 1  | 4  |    |   |
| Battey, Earl              |    |    |    | 1 |
| Batts, Matt*              | 1* |    |    |   |
| Bauer, Hank               | 3  | 4  |    | 2 |
| Bearden, Gene             | 1  | 1  |    |   |
| Belinsky, Bo              | 3  | 9  |    |   |
| Bell, Gus                 | 1  |    |    |   |
| Bickford, Vern            | 1  | 1  |    |   |
| Bird, Joe*                |    |    | 1* |   |
| Bissonette, Del           | 1  |    |    |   |
| Black, Don                | 1  |    |    |   |
| Black, Joe                | 1  | 2  |    |   |
| Blackwell, Ewell          | 2  | 12 |    | 1 |
| Blades, Ray               | 1  | 2  |    |   |
| Blaemire, Rae*            | 1* |    |    |   |
| Blake, Fred (Sheriff)     | 1  |    |    |   |
| Blakely, Lincoln*         | 1* |    |    |   |
| Blanchard, John           | 1  | 1  |    |   |
| Blass, Steve              | 1  | 1  |    |   |
| Blattner, Buddy           | 1  |    |    |   |
| Blefary, Curt             | 2  | 1  |    |   |
| Bluege, Ossie             | 1  |    |    |   |
| Boken, Bob*               | 1* |    |    |   |

|                           |    |    |    |   |
|---------------------------|----|----|----|---|
| Boley, Joe                | 1  |    |    |   |
| Bolling, Frank            | 2  |    |    |   |
| Bolling, Mitt             | 1  |    |    |   |
| Boring, Bob*              | 1* |    |    |   |
| Borkowski, Bob*           | 1* |    | 1* |   |
| Boros, Steve              | 1  | 1  |    |   |
| Boss, Harley              | 1  |    |    |   |
| Boudreau, Lou             | 2  | 5  |    |   |
| Boyer, Cloyd              | 1  |    |    | 1 |
| Bragan, Bobby             | 1  | 5  |    |   |
| Branca, Ralph             | 1  | 1  |    |   |
| Breadon, Sam              | 2  | 2  |    |   |
| Brecheen, Harry           | 1  | 1  |    |   |
| Brechin, John*            | 1* |    |    |   |
| Brewster, Charlie*        | 1* |    |    |   |
| Bridges, Rocky            | 1  | 2  |    |   |
| Brissie, Lou              | 1  | 2  |    | 1 |
| Broglio, Ernie            | 2  |    |    |   |
| Brosnan, Jim*             | 1  | 2  |    |   |
| Brown, Lloyd              | 1  |    |    |   |
| Brown, Mordecai           | 1  |    |    |   |
| Brown, Tommy*             | 2* | 2  |    |   |
| Browne, Earl              | 1  |    |    |   |
| Brunet, George            | 2  | 3  |    |   |
| Bruton, Bill              | 3  |    |    |   |
| Bryant, Clay              | 2  | 3  |    |   |
| Bunning, Jim              | 3  | 6  |    | 1 |
| Burdette, Lew             | 5  | 8  |    | 1 |
| Burgess, Forrest (Smoky)* | 1  | 12 | 2* |   |
| Burns, Jim*               | 2  |    | 1* |   |
| Busby, Jim                | 1  |    |    |   |
| Bush, Guy                 | 1  | 1  | 1  |   |
| Buzhardt, John            | 2  |    |    |   |
| Byam, George*             | 1* |    |    |   |
| Byrne, Tommy              | 1  | 1  |    |   |
| Cadore, Leon              | 1  |    |    | 1 |
| Campbell, Bruce           |    |    |    | 1 |
| Cardenas, Leo             | 3  | 1  |    |   |
| Cardwell, Don             | 1  |    |    |   |
| Carey, Max                | 2  | 3  |    |   |
| Carpenter, Bob*           | 1  | 1  |    |   |

|                           |    |    |    |   |
|---------------------------|----|----|----|---|
| Cash, Norm                | 2  | 4  |    |   |
| Cater, Danny              | 2  | 3  |    |   |
| Cepeda, Orlando           | 1  |    |    |   |
| Cerv, Bob                 | 1  | 1  |    |   |
| Chagman, Leon*            |    |    | 1  |   |
| Chambers, Cliff           | 1  |    |    | 1 |
| Chance, Bob               | 2  |    |    |   |
| Chance, Dean              | 2  | 3  |    |   |
| Chandler, Spurgeon (Spud) | 2  |    |    |   |
| Chapman, Ben              | 2  | 14 | 1  |   |
| Chapman, Calvin*          | 2* |    | 4* |   |
| Charton, Pete             | 3  | 7  |    |   |
| Chase, Hal                | 2  |    |    |   |
| Chatham, Buster           | 1  |    | 1  |   |
| Cheney, Tom               | 2  |    |    |   |
| Chipman, Bob              | 2  |    |    |   |
| Christopher, Joe          | 2  |    |    |   |
| Christopher, Russ         | 1  |    |    | 1 |
| Cimoli, Gino              | 1  | 1  |    |   |
| Cissell, Chalmers         | 1  |    |    |   |
| Clark, Watson (Lefty)     | 1  |    |    |   |
| Clarke, Fred              | 1  |    |    |   |
| Clary, Ellis              | 1  | 6  |    | 1 |
| Clendenon, Donn           | 1  |    |    |   |
| Cloninger, Tony           | 1  |    |    | 1 |
| Coan, Gil                 | 1  |    |    |   |
| Cochrane, Mickey          | 1  | 1  |    |   |
| Cohen, Andy               | 1  | 4  |    |   |
| Coker, Jim                | 1  |    |    |   |
| Coleman, Gerry            | 2  | 4  |    |   |
| Coles, Chuck*             | 1* | 3  |    |   |
| Collier, Orlin*           | 1* |    |    |   |
| Collins, Eddie            | 1  |    |    |   |
| Collins, James (Rip)      | 1  | 4  |    |   |
| Conley, Gene              | 1  | 2  |    |   |
| Constable, Jim*           | 1* |    |    |   |
| Cook, Cliff*              | 1* |    |    |   |
| Coombs, Jack              | 1  | 1  |    |   |
| Cooney, John              | 2  |    |    |   |
| Cooper, Morton            | 1  | 2  |    |   |
| Cooper, Walker            | 2  |    |    |   |

|                          |    |    |    |   |
|--------------------------|----|----|----|---|
| Corley, Pierce (Pearce)* | 1* |    |    |   |
| Cortazzo, Shine (Jess)*  | 1  |    |    |   |
| Coscarart, Pete*         | 1  |    |    |   |
| Cosman, Jim              | 3  | 6  |    |   |
| Cosmidis, Alex*          | 1* |    |    |   |
| Courtney, Clint          | 1  | 2  |    |   |
| Coveleskie, Harry        | 1  |    |    |   |
| Cox, Billy               | 2  |    |    |   |
| Craft, Harry*            | 1  | 7  | 1* |   |
| Cronin, Joe              | 5  | 10 |    | 2 |
| Crosetti, Frank          | 1  | 4  |    |   |
| Crouch, Bill*            |    |    | 1* |   |
| Crouch, Jack*            | 1* |    |    |   |
| Cuccinello, Al*          |    |    | 2* |   |
| Cuccurullo, Art*         | 1* |    |    |   |
| Cuellar, Mike            | 2  |    |    |   |
| Cullop, Nick             | 2  | 5  |    |   |
| Cunningham, Joe          | 1  | 1  |    |   |
| Dalrymple, Clay          | 2  |    |    |   |
| Damato, Joe*             | 3* |    |    |   |
| Dark, Alvin              | 3  | 17 |    | 1 |
| Daubert, Jake            | 1  |    |    |   |
| Davenport, Jim           | 2  |    |    |   |
| Davidson, Crawford*      |    |    | 1  |   |
| Davis, Jerry*            | 1* | 1  |    |   |
| Davis, Willie            | 4  | 1  |    |   |
| Dean, Dizzy              | 3  | 32 |    |   |
| DeBerry, Hank            | 1  |    | 1  |   |
| Derringer, Paul          | 1  | 4  |    |   |
| Dewitt, Bill             | 1  |    |    |   |
| Dickey, Bill             | 2  | 8  |    | 2 |
| Dickey, Skeets           |    |    | 1  | 1 |
| Dickson, Murry           | 2  | 1  |    |   |
| Didier, Bob              | 2  | 1  |    |   |
| Dietz, Dick              | 1  | 1  |    |   |
| DiPippo, Larry*          | 1* |    |    |   |
| Ditmar, Art              | 1  | 1  |    |   |
| DiMaggio, Dominic        | 2  |    |    |   |
| Dobson, Joe              | 1  |    | 2  |   |
| Doby, Larry              | 2  |    |    |   |
| Doerr, Bobby             | 1  |    |    |   |

|                             |    |    |   |   |
|-----------------------------|----|----|---|---|
| Donnelly, Blix              | 1  |    |   | 1 |
| Donovan, Dick               | 2  | 1  |   |   |
| Dorish, Harry               | 1  |    |   | 3 |
| Dotterer, Henry (Dutch)*    | 2* | 2  |   |   |
| Dotterer, Tom*              | 1* |    |   |   |
| Douglas, Phil               | 1  |    | 2 | 2 |
| Downs, Ben*                 | 1* |    |   |   |
| Doyle, Larry*               | 1* | 4  |   |   |
| Drabowsky, Moe              | 2  |    |   | 1 |
| Dreisewerd, Clem*           | 2* | 1  |   |   |
| Dressen, Charles (Chuck)*   | 5* | 34 | 1 | 2 |
| Dropo, Walt                 | 4  |    |   | 3 |
| Drummond, Cal               | 1  |    |   |   |
| Drysdale, Don               | 3  | 7  |   |   |
| Duckworth, Jim              | 1  |    |   |   |
| Dueker, Anthony (Sam)*      | 1* |    |   |   |
| Dugas, Gus (Lefty)*         | 1* | 1  |   |   |
| Duke, Willie*               | 2* | 1  |   |   |
| Durnbaugh, Bobby*           | 2* |    |   |   |
| Dwyer, Joe*                 | 2* |    |   |   |
| Dyer, Eddie                 | 1  |    |   | 1 |
| Dykes, Jimmy                | 2  | 8  |   |   |
| Easterwood, Roy*            | 1  | 1  | 1 |   |
| Eaves, Vallie*              | 1* |    |   |   |
| Edwards, Doc                | 1  |    |   |   |
| Edwards, John (Johnny)*     | 3* | 3  |   |   |
| Ehmke, Howard               |    |    |   | 1 |
| Eiland, Sharkey*            | 2* |    | 1 |   |
| Elliott, Bob                |    |    |   | 1 |
| Ellis, Sammy                | 2  | 3  |   |   |
| Embree, Charley (Red)*      | 1  |    |   |   |
| Engel, Joe                  | 4  | 19 | 2 |   |
| English, Charlie (Charley)* | 1* |    |   |   |
| English, Elwood (Woody)     |    |    |   | 1 |
| Erault, Edward              |    |    |   | 1 |
| Erickson, Paul*             | 2* |    |   |   |
| Erskine, Carl               | 3  | 5  |   |   |
| Etchison, Buck*             | 1* |    |   |   |
| Evans, Al                   | 1  | 1  |   |   |
| Evans, Billy                | 1  | 8  |   |   |
| Evers, Walter               |    |    |   | 1 |

|                       |    |   |    |    |
|-----------------------|----|---|----|----|
| Fain, Ferris          | 1  | 1 |    |    |
| Fallon, George*       | 2* |   | 1  |    |
| Felderman, Marvin*    | 2* |   | 1* |    |
| Fernandes, Eddie*     | 1* |   |    |    |
| Fisher, Jack          | 2  |   |    |    |
| Fitzpatrick, John     | 2  |   |    |    |
| Flammini, Umberto*    | 1* |   |    |    |
| Fleig, Fred           | 1  |   |    |    |
| Fleming, Les*         | 4* | 2 | 7  |    |
| Flood, Curt           | 2  | 4 |    |    |
| Fogg, Floyd*          | 3* |   | 2  |    |
| Fondy, Dee            | 1  | 1 |    |    |
| Ford, Ed (Whitey)     | 3  | 9 |    |    |
| Fosse, Ray            | 1  |   |    | 1  |
| Foulk, Leon*          | 1* |   | 1* |    |
| Fowler, Art           | 2  | 4 |    |    |
| Fox, Pete             | 1  |   |    |    |
| Foxx, Jimmy           | 3  | 7 |    |    |
| Francona, Tito        | 3  | 2 |    |    |
| Frazier, Joe          | 1  | 1 |    |    |
| Fredericks, Johnny    | 1  |   |    |    |
| Freehan, Bill         | 4  | 2 |    |    |
| Freeman, Herschel     | 3  |   |    |    |
| Frey, Bennie          | 1* |   |    |    |
| Frey, Linus           | 3* |   |    |    |
| Fridley, Jim*         | 1  | 1 |    |    |
| Friend, Owen          | 2  |   |    |    |
| Furillo, Carl         | 2  |   |    | 1  |
| Galan, Augie          | 2  |   |    | 2  |
| Galehouse, Denny      | 1  |   |    | 1  |
| Garver, Ned           | 2  |   |    |    |
| Gehrig, Lou           |    | 3 |    | 4  |
| Gehrig, Lou Mrs.      | 1  | 4 |    |    |
| Gilbert, Buddy*       | 1* | 2 |    |    |
| Gilbert, Charlie*     | 7* | 1 | 7* | 2* |
| Gilbert, Larry, Jr. * | 3* | 1 | 37 |    |
| Gilbert, Tookie*      | 3* | 3 | 4* |    |
| Gill, Johnny*         | 3* | 1 | 3* |    |
| Gordon, Joe           | 2  |   |    |    |
| Gowdy, Hank           | 1  | 2 |    |    |
| Grace, Earl*          | 1* |   | 1* |    |

|                          |    |   |    |   |
|--------------------------|----|---|----|---|
| Grantham, George*        | 2* |   |    |   |
| Greenberg, Hank          | 3  | 7 |    |   |
| Greengrass, Jim          | 2  |   |    | 1 |
| Grissom, Lee*            | 1* |   |    |   |
| Groat, Dick              | 1  | 5 |    |   |
| Gromek, Steve            | 1  |   |    |   |
| Grove, Lefty             | 2  | 4 |    |   |
| Gustine, Frank           | 1  |   |    |   |
| Haas, Bert*              | 1  |   | 6* | 3 |
| Hack, Stan               | 2  |   |    |   |
| Hacker, Warren           | 1  |   |    | 1 |
| Haddix, Harvey           | 2  | 3 |    |   |
| Haines, Jesse            | 1  | 1 |    |   |
| Hamilton, Jimmy*         | 3* |   | 2  |   |
| Hamner, Gran             | 1  | 2 |    |   |
| Hamrick, Raymond (Ray)*  | 2  |   | 1* | 1 |
| Harder, Mel              | 1  | 2 |    |   |
| Hart, Bill               | 1  |   |    |   |
| Hartness, Edd*           | 1* |   |    |   |
| Hartnett, Gabby          | 2  | 1 |    | 2 |
| Hartung, Clint*          | 2* | 5 |    |   |
| Hasson, Gene*            |    |   | 1* |   |
| Hatten, Joe*             | 1  |   |    |   |
| Hatton, Grady            | 1  | 1 |    |   |
| Hayden, Gene*            | 1* |   |    |   |
| Hazle, Bob*              | 1  | 3 |    |   |
| Head, Ed                 | 1  | 1 |    |   |
| Hearn, Jim               | 1  | 3 |    |   |
| Heffner, Don             | 1  | 6 |    |   |
| Hegan, Jim               | 2  |   |    | 1 |
| Heilmann, Harry          | 1  | 1 |    | 1 |
| Helf, Hank*              | 1* | 1 |    |   |
| Hemsley, Rollie*         | 1* | 1 | 3* |   |
| Hennessey, George*       |    |   | 3* |   |
| Henrich, Tommy           | 1  | 7 |    |   |
| Hicks, Mel*              | 1* |   |    |   |
| Higbe, Kirby             | 1  |   |    | 1 |
| Hilcher, Walter*         | 1* |   |    |   |
| Hill, Hugh               | 2  |   |    |   |
| Hockett, Oris*           | 1* |   |    |   |
| Hofferth, Stuart (Stew)* |    |   | 1* |   |

|                           |    |    |    |   |
|---------------------------|----|----|----|---|
| Hogan, Shanty             |    |    |    | 1 |
| Hollingsworth, Al*        | 1  |    |    |   |
| Hollmig, Stan*            | 1* |    |    |   |
| Holmes, Tommy             |    | 2  |    |   |
| Hooks, Alex               | 1  |    |    |   |
| Hopp, Johnny              | 1  |    |    |   |
| Hornsby, Rogers           | 1  |    |    |   |
| Host, Gene*               | 1* |    |    |   |
| Howe, Cal*                | 1* | 2  |    |   |
| Howell, Dixie             | 1  |    |    |   |
| Hoyt, Waite*              | 1  | 14 |    |   |
| Hudlin, Willis            | 1  | 1  |    |   |
| Hudson, Sid               | 1  |    |    | 1 |
| Huggins, Miller           | 1  | 1  |    |   |
| Hughes, Bill*             | 1* |    |    |   |
| Hutchinson, Freddie       | 2  | 11 |    |   |
| Irons, Eddie*             | 1* |    |    |   |
| Irvin, Monte              | 2  | 2  |    |   |
| Jackson, Joe (Shoeless)   | 3  | 1  |    |   |
| Jackson, Travis           |    | 2  |    |   |
| Jakucki, Sig              |    |    |    | 1 |
| Jamieson, Charley         |    |    |    | 1 |
| Jasinski, Ziggy*          | 1* |    |    |   |
| Javier, Julian            | 2  | 1  |    |   |
| Jeffcoat, George*         | 4* |    | 1* |   |
| Jeffcoat, Hal*            | 2* |    | 1* |   |
| Johnson, Ken              | 1  | 1  |    |   |
| Johnson, Roy              |    |    |    | 2 |
| Johnson, Steamboat        | 1  |    |    |   |
| Johnson, Walter           |    | 3  |    | 4 |
| Johnson, Woodrow (Woody)* | 2* |    | 3* |   |
| Jones, Macon              |    |    |    | 1 |
| Jones, Sam                | 1  |    |    | 1 |
| Joost, Eddie              |    | 3  |    | 1 |
| Jordan, Baxter (Buck)     | 1  | 1  |    |   |
| Joyner, Everette (Ev)     | 1* |    |    |   |
| Judge, Joe                |    |    |    | 1 |
| Kamm, Willie              |    |    |    | 1 |
| Kampouris, Alex           |    |    |    | 1 |
| Keller, Charley           | 1  | 3  |    |   |
| Keller, Hal               | 1  |    |    |   |

|                           |    |   |   |   |
|---------------------------|----|---|---|---|
| Kelley, Harry             | 1  | 1 |   |   |
| Kelly, George             |    | 3 |   | 2 |
| Keltner, Ken              |    |   |   | 1 |
| Kennedy, Richard(Dick)*   | 1* |   |   |   |
| Kennedy, Forrest (Frosty) | 1  | 1 |   |   |
| Kennedy, Vernon           |    |   |   | 1 |
| Keough, Joe               | 2  |   |   |   |
| Keyes, Stan*              | 1  |   |   |   |
| Killifer, Bill            |    |   |   | 1 |
| Kimsey, Al*               | 1  |   |   |   |
| Kinder, Ellis             | 1  | 3 |   | 1 |
| Kiner, Ralph              | 3  | 1 |   |   |
| King, Chief Moses*        | 1* |   |   |   |
| Kirby, James (Jim)*       | 1* |   |   |   |
| Klein, Chuck              | 1  |   |   |   |
| Klein, Lou                | 1  |   |   |   |
| Kleine, Hal*              | 1* |   |   |   |
| Kluszewski, Ted           | 1  | 8 |   |   |
| Knickerbocker, Bill       | 1  |   |   | 1 |
| Kober, Bob                | 2  |   |   |   |
| Koenig, Mark              | 1  | 1 |   |   |
| Konstanty, Jim            | 1  | 3 |   |   |
| Kores, Art*               | 1  |   |   | 1 |
| Kreevich, Mike            |    |   |   | 1 |
| Kretlow, Lou              | 1  |   |   | 1 |
| Kucks, John (Johnny)      | 1  | 1 |   |   |
| Kuenn, Harvey             | 2  | 1 |   |   |
| Kuhel, Joe                | 2  | 1 |   |   |
| Kuk, Steve*               | 1* |   | 1 |   |
| Kurowski, George          | 1  |   |   | 1 |
| Kuzava, Bob               | 2  |   |   |   |
| Laabs, Chet               |    |   |   | 1 |
| Labine, Clem              | 1  | 1 |   | 1 |
| Lacy, George*             | 1  | 1 |   |   |
| Laga, Frank               | 1* |   |   |   |
| Lajoie, Nap               | 3  | 5 |   |   |
| Lake, Eddie               | 1  |   |   | 1 |
| Lamabe, Jack              | 1  |   |   |   |
| Lammers, Wally*           | 1* |   |   |   |
| Landenberger, Ken*        | 1* |   |   |   |
| Larsen, Don               | 1  | 6 |   |   |

|                          |    |    |   |   |
|--------------------------|----|----|---|---|
| Lary, Al*                | 1* |    |   |   |
| Lary, Frank              | 3  | 6  |   |   |
| Lary, Lynn               | 1  |    |   | 1 |
| Law, Vernon              | 1  | 1  |   |   |
| Lawson, Roxy*            | 1* |    |   | 1 |
| Layne, Hillis            | 1  |    |   |   |
| Lazzeri, Tony            | 1  |    |   |   |
| Leach, Tommy             |    |    | 3 |   |
| Lee, Hal*                | 1* |    |   |   |
| Leggett, Doc*            | 1* |    |   |   |
| Leitz, Al*               | 1* |    |   |   |
| Leja, Frank*             | 1* | 2  |   |   |
| Lenhart, Don             | 2  |    |   |   |
| Levan, Jesse             | 1  |    |   |   |
| Lewis, Buddy             | 1  | 1  |   | 1 |
| Libby, Dick*             | 1* |    |   |   |
| Lindell, Johnny          | 2  |    |   |   |
| Liptak, Johnny*          | 1* |    |   |   |
| Litwhiler, Dan           | 2  | 1  |   |   |
| Loes, Billy              | 2  |    |   |   |
| Long, Dale               | 1  | 6  |   |   |
| Ludwig, Bob*             |    |    |   | 1 |
| Lumpe, Jerry             | 1  |    |   |   |
| Luque, Adolpho           |    |    |   | 1 |
| Lyons, Ted               | 2  | 4  |   | 1 |
| McAdams, Ralph*          | 1* |    |   |   |
| McBride, Tom             | 1  |    | 1 |   |
| McCabe, Joe*             | 1* |    |   |   |
| McCall, Bob (Dutch)*     | 2* |    | 3 |   |
| McCarter, Slat*          | 1* |    |   |   |
| McCarthy, Joe            | 3  | 30 |   |   |
| McCarthy, Johnny         |    |    |   | 1 |
| McCormick, Frank (Buck)* | 4* |    | 1 |   |
| McCormick, Mike          | 1  |    |   | 1 |
| McCoy, Benny             |    |    |   | 1 |
| McCutcheon, Red          | 1  |    |   |   |
| McDade, Ed*              | 1* |    | 1 |   |
| McDaniel, Skeet*         |    |    | 1 |   |
| McDevitt, Danny          | 1  | 1  |   |   |
| McGhee, Bill*            | 1* |    |   |   |
| McGhee, Ed               | 1  |    |   |   |

|                            |    |    |   |   |
|----------------------------|----|----|---|---|
| McGlothin, Ezra (Pat)      | 1  |    |   |   |
| McGowan, Earl              | 1  |    |   |   |
| McGraw, John               |    | 3  |   | 2 |
| McLish, Cal                | 1  | 1  |   |   |
| McMahon, Don               | 2  |    |   |   |
| McMillan, Frank*           | 1* |    | 1 |   |
| McQuinn, George            | 2  |    |   |   |
| Mack, Connie               | 2  | 33 | 2 |   |
| Mack, Earle                |    |    |   | 1 |
| Mack, Ray                  |    |    |   | 2 |
| Mackenzie, Ken             | 1  |    |   |   |
| MacPhail, Larry            |    | 8  |   |   |
| Mahrt, Ronnie*             | 1* |    |   |   |
| Mailho, Emil               |    | 2  | 1 | 2 |
| Mails, Duster              |    |    |   | 1 |
| Malay, Joe                 | 1  |    |   |   |
| Mallette, Mal              |    |    |   | 1 |
| Mallory, Pete*             | 3* | 1  | 1 |   |
| Malone, Pat*               |    |    |   | 1 |
| Maloney, Jim*              | 3* | 3  |   |   |
| Malzone, Frank             | 2  | 4  |   | 1 |
| Mancuso, Frank             |    |    |   | 1 |
| Mancuso, August (Gus)      |    |    |   | 2 |
| Mann, Leslie               | 1  |    |   |   |
| Mann, Red*                 |    |    | 1 |   |
| Manning, William (Bill)*   |    |    | 1 |   |
| Mantilla, Felix            | 2  |    |   |   |
| Manush, Heinie             |    | 2  |   |   |
| Maranville, W. J. (Rabbit) | 1  |    |   |   |
| Marberry, Fred             |    | 2  |   | 1 |
| Marino, Frank*             | 2* |    |   |   |
| Marion, Roy*               | 1* |    |   |   |
| Marquard, Rube             | 1  | 2  |   | 1 |
| Marshall, Clarence         | 1  |    |   |   |
| Marshall, Larry            | 2  |    | 2 |   |
| Marshall, Mike             | 1  |    |   |   |
| Martin, Fred               |    |    |   | 1 |
| Martin, Hershel            |    |    |   | 1 |
| Martin, Pepper             | 2  | 8  |   |   |
| Martynik, Mike*            | 1  |    | 1 |   |
| Masterson, Walter          | 1  | 1  |   |   |

|                           |    |   |    |   |
|---------------------------|----|---|----|---|
| Mathewson, Christy        |    |   |    | 4 |
| Mathis, Red               | 1  |   |    |   |
| Matulis, Adolph*          | 1* |   |    |   |
| Mauldin, Marshall         | 1  |   |    |   |
| Mauldin, Paul*            | 1* |   | 2  |   |
| Mauriello, Ralph (or Joe) | 1  |   |    |   |
| Maynard, Buster*          | 1* |   |    |   |
| Mays, Carl                |    | 2 |    |   |
| Medwick, Joe              | 1  | 5 |    |   |
| Meeks, Sammy              | 1  | 3 |    | 1 |
| Meers, Russell (Russ)*    | 1* | 1 | 1  |   |
| Melton, Jim*              | 1* |   |    |   |
| Menking, Paul*            | 1* |   |    |   |
| Meyer, Bill               | 1  | 1 |    |   |
| Meyer, Russ*              | 3* | 1 | 1  |   |
| Micciche, Joseph (Joe)*   | 1* |   |    |   |
| Milan, Clyde              | 2  |   |    |   |
| Milnar, Al                | 1  |   | 1  |   |
| Milstead, George*         | 1  |   |    |   |
| Minoso, Orestes (Minnie)  | 3  | 3 |    |   |
| Mize, Johnny              | 2  | 6 |    |   |
| Modica, Pete*             | 2* | 1 | 2* |   |
| Moisan, Bill*             | 1* |   |    |   |
| Montag, Bob               | 1  |   |    |   |
| Moon, Leo*                | 1  |   | 1  |   |
| Moore, Dee*               | 2* |   |    |   |
| Moore, Eddie              | 2  |   |    |   |
| Moore, Terry              | 1  | 1 |    |   |
| Moorhead, Bob*            | 1* |   |    |   |
| Mooty, Jake*              | 1* |   | 1* |   |
| Morgan, Eddie             |    |   | 1  |   |
| Morgan, Vernon*           | 2* |   |    |   |
| Moser, Arnold*            | 1* |   | 1* |   |
| Mueller, Heinie*          | 1* |   | 1* |   |
| Muffett, Billy            | 1  | 1 |    |   |
| Mullin, Pat               | 2  |   |    |   |
| Muncrief, Bob             | 1  |   |    | 1 |
| Murray, Glenn*            | 1* |   |    |   |
| Nahem, Sam*               | 1* |   | 1  |   |
| Neccai, Ron               | 1  |   |    | 1 |
| Nehf, Art                 | 1  | 1 |    | 1 |

|                               |    |   |    |   |
|-------------------------------|----|---|----|---|
| Neill, Tom*                   | 1* |   | 2* |   |
| Newcombe, Don                 | 2  | 7 |    |   |
| Newsom, Bobo                  | 2  | 3 |    |   |
| Newsome, Skeeter              | 1  | 1 |    |   |
| Nicholas, Don*                | 1* | 2 |    |   |
| Nicholson, Bill               | 1  |   | 1  |   |
| Niehoff, Bert                 | 1  | 4 |    |   |
| Nonnencamp, Leo               | 1  |   | 1  |   |
| Norman, Bill                  | 1  | 1 |    |   |
| Novotney, Rube*               | 1* |   |    |   |
| O'Neill, Steve                | 1  | 1 |    |   |
| Olson, Karl                   | 1  |   |    |   |
| Oravetz, Ernie                | 1  | 3 |    |   |
| Outlaw, Jimmy                 | 1  |   | 1  |   |
| Padgett, Elbert*              | 1* |   |    |   |
| Page, Phil                    | 1  | 1 |    |   |
| Palmisano, Joe*               | 1  |   | 1  |   |
| Panko, Emil*                  | 1* |   |    |   |
| Parks, Artie*                 | 1* |   |    |   |
| Parnell, Mel                  | 1  | 1 |    |   |
| Partridge, Jay*               | 1* |   |    |   |
| Pavick, Bill*                 | 1* |   |    |   |
| Pawelek, Ted*                 | 1* |   |    |   |
| Peacock, John*                | 1* |   |    |   |
| Peel, Homer*                  | 1  |   |    | 1 |
| Perdue, Hub*                  | 1* | 2 |    |   |
| Pesky, Johnny                 | 1  | 3 |    |   |
| Peterson, Kent                | 1  |   |    | 1 |
| Peterson, Roy*                | 1* |   |    |   |
| Piet, Tony                    | 1  |   |    |   |
| Pipgras, George*              |    |   | 1  | 1 |
| Pitler, Jake                  | 1  |   |    |   |
| Platt, Whitey*                | 1* |   |    |   |
| Pless, Rance*                 | 1  | 1 |    |   |
| Poffenberger, Cletus (Boots)* | 3* | 3 | 3* |   |
| Poindexter, Jennings (Jink)*  | 1  |   |    |   |
| Polli, Crip                   | 1  |   |    |   |
| Poole, Jim*                   | 2  | 3 |    |   |
| Porter, Dick                  | 1  | 1 |    |   |
| Powers, Mike*                 | 1* |   |    |   |
| Pruett, Jim*                  | 1  |   |    |   |

|                         |    |   |    |   |
|-------------------------|----|---|----|---|
| Pulford, Don*           | 1* |   |    |   |
| Purdy, Pid*             | 2* |   |    |   |
| Quick, Hal*             | 1* |   | 2* |   |
| Rabe, Charley*          | 1* |   |    |   |
| Radulovich, Bill*       | 1* |   |    |   |
| Rambert, Elmer (Pep)*   | 2  |   |    |   |
| Rapp, Earl*             | 1* | 1 |    |   |
| Reese, Andy             | 3  | 2 |    |   |
| Reid, Bob*              | 1* |   |    |   |
| Reid, Jackie*           | 1* |   |    |   |
| Rhodes, Jim (Dusty)*    | 3* | 7 | 1* |   |
| Rice, Harry*            | 1* |   |    |   |
| Richbourg, Lance*       | 3* | 6 | 1* |   |
| Richards, Duane*        | 1* |   |    |   |
| Richards, Fred*         | 1* |   |    |   |
| Riddle, Buck            | 1  |   | 1  |   |
| Ringhofer, Walter*      | 2* |   |    |   |
| Roberts, Keru*          | 1* |   |    |   |
| Roberts, Robin          | 4  | 4 |    |   |
| Robertson, Don*         | 1* |   |    |   |
| Robinson, Paul*         | 1* |   |    |   |
| Rocco, Mickey*          | 2  |   | 2* |   |
| Rodda, Bill*            | 3* |   | 7* |   |
| Rodemoyer, Howard*      | 1* |   |    |   |
| Rodin, Eric*            | 3* |   | 1  |   |
| Roettger, Walter        | 2  |   |    |   |
| Rogers, Dago Bill       | 1  |   | 1  |   |
| Rogers, Lee*            | 3* |   | 2* |   |
| Rogers, Packy*          | 1* |   | 1* |   |
| Rogers, Tom*            |    |   |    | 1 |
| Rolfe, Red              | 1  | 1 |    |   |
| Rose, Eddie*            | 2  |   |    |   |
| Rosen, Al               | 1  | 1 |    |   |
| Rospond, Wally*         |    |   | 1* |   |
| Roush, Eddie            | 1  | 3 |    | 3 |
| Rowe, Ralph*            | 1* |   |    |   |
| Rowland, Clarence       | 1  | 8 |    |   |
| Rudolph, Don            | 1  |   |    |   |
| Ruel, Herold D. (Muddy) | 1  | 1 |    | 1 |
| Runnels, Pete           | 1  |   |    |   |
| Rush, Bob*              | 2  | 1 |    |   |

|                         |    |    |    |   |
|-------------------------|----|----|----|---|
| Russell, Jim            | 1  |    |    |   |
| Ryan, Conny             | 1  | 2  | 1  |   |
| Ryan, Ellis             | 2  |    |    |   |
| Sahlin, William (Bill)* | 1* |    | 1* |   |
| Salvatierra, Manuel*    |    |    | 1* |   |
| Sanders, Warren (War)*  | 1  | 1  |    |   |
| Sarni, Bill*            | 1  | 2  |    |   |
| Sauer, Hank             | 1  | 1  |    |   |
| Sauer, Ed*              | 1* |    |    |   |
| Saurbrun, Kip*          |    |    | 1* |   |
| Semler, Joseph (Joe)*   | 1* |    |    |   |
| Scalzi, Frank (Skeeter) | 1  | 8  |    |   |
| Schenz, Henry (Hank)*   | 1* |    | 1* |   |
| Schmees, George*        | 2* |    |    |   |
| Schmidt, Keith*         | 1* |    |    |   |
| Schmitt, Jake*          | 1* |    |    |   |
| Scott, Kelly*           | 1* |    | 1* |   |
| Scott, LeGrant*         | 2  |    | 1  |   |
| Scott, Trammell         | 1  | 3  |    |   |
| Sewell, Truett (Rip)*   | 4  | 29 | 5  |   |
| Sharp, Kola             |    |    | 1  |   |
| Shearer, Ray*           | 1* |    |    |   |
| Sheehan, John T. (Jack) | 1  | 2  |    |   |
| Sheehan, Thomas (Tom)*  | 1  | 3  |    |   |
| Shilling, Jim*          | 2* |    | 1* |   |
| Shirley, Mule*          |    |    | 1* |   |
| Shore, Ernie            | 1  |    |    |   |
| Shuba, George           | 3  | 1  | 1  |   |
| Siebern, Norm           | 1  | 1  |    |   |
| Signer, Walter*         | 2* |    | 1* |   |
| Silvera, Charlie        | 2  | 6  |    |   |
| Simmons, Al             | 3  |    |    | 1 |
| Simpson, Hal            | 1  | 1  |    |   |
| Singleton, Jim*         | 1* |    |    |   |
| Sisler, George          | 2  | 14 |    |   |
| Skinner, Bob            | 1  | 1  |    |   |
| Skiza, Lou*             | 1* |    |    |   |
| Skowron, Bill           | 2  | 1  |    |   |
| Slaughter, Enos         | 1  | 12 |    | 3 |
| Smith, Al               | 2  | 1  |    |   |
| Smith, Frank*           | 1* | 2  |    |   |

|                            |    |    |    |  |
|----------------------------|----|----|----|--|
| Smith, Hal                 | 1  | 1  |    |  |
| Speake, Bob*               | 1  |    |    |  |
| Speaker, Tris              | 3  | 4  |    |  |
| Speece, Byron*             | 1* |    |    |  |
| Spence, Stan               | 2  |    |    |  |
| Spencer, Daryl*            | 2  |    |    |  |
| Spicer, Bobby*             | 1* |    |    |  |
| Sprankle, Jim*             | 1* | 1  | 1* |  |
| Stafford, Hal*             | 2* |    |    |  |
| Stallcup, Virgil           | 1  |    |    |  |
| Staller, George*           |    |    | 1* |  |
| Stankey, Lawrence (Larry)* | 1* |    |    |  |
| Starr, Ray*                |    | 4  | 2* |  |
| Statz, Arnold (Jigger)     | 1  | 1  |    |  |
| Stephenson, Riggs          | 2  |    | 1  |  |
| Stewart, Mack*             | 1* |    | 2* |  |
| Stobbs, Chuck              | 1  | 3  |    |  |
| Stone, John                | 1  |    |    |  |
| Street, Gabby*             | 1  | 1  |    |  |
| Stringfellow, Joe*         | 1* |    |    |  |
| Stupak, Joe*               | 1* |    |    |  |
| Sucheck, Jim*              | 1* |    |    |  |
| Sukeforth, Clyde           | 1  |    |    |  |
| Summers, William (Bill)    | 1  | 2  |    |  |
| Susce, George, Sr.         | 1  | 2  |    |  |
| Taitt, Doug (Poco)*        | 1  |    | 1  |  |
| Talbot, Bob*               | 1* |    |    |  |
| Tamulis, Vito*             | 1* |    | 1* |  |
| Tappe, Ted*                | 1* |    |    |  |
| Tatum, Tommy*              | 3* |    |    |  |
| Taylor, Bill*              | 1  |    |    |  |
| Taylor, Zachary            | 2  |    |    |  |
| Tepler, Boyd*              | 1* | 1  |    |  |
| Terry, Ralph               | 1  | 3  |    |  |
| Thomassie, Pete*           | 1  |    |    |  |
| Thompson, Fresco           | 2  | 10 |    |  |
| Thornton, Foster* (Cowboy) | 1* |    |    |  |
| Tieman, Jerry*             | 1* |    |    |  |
| Tinker, Joe                | 1  | 4  |    |  |
| Tolson, Chet               | 1  |    |    |  |
| Tomkinson, Phil*           | 1* |    |    |  |

|                          |    |    |    |   |
|--------------------------|----|----|----|---|
| Toney, Fred*             | 3  | 2  | 2  |   |
| Toporcer, George         | 1  | 2  |    |   |
| Treadway, Leon (Red)*    | 1* |    |    |   |
| Triplett, Coaker*        | 1  |    | 1  |   |
| Trosky, Hal, Jr.*        | 1* |    |    |   |
| Tubb, Julian*            | 1* |    |    |   |
| Twardy, Leo*             | 1* |    | 2* |   |
| Vance, Dazzy             | 2  | 11 |    | 2 |
| Vaughn, Fred*            | 1* |    |    |   |
| Verbic, Richard (Dick)*  | 1* |    |    |   |
| Vernon, Mickey           | 2  | 2  |    |   |
| Veverka, Frank*          |    |    | 1* |   |
| Wade, Ben*               | 2* |    | 2* |   |
| Wagner, Honus            | 2  | 1  |    |   |
| Wagner, Leon             | 1  | 1  |    |   |
| Wakefield, Dick          | 1  |    | 1  | 2 |
| Walker, Hubby (Hub)*     | 1* | 1  | 1* |   |
| Walsh, Ed                | 1  | 1  |    |   |
| Walsh, John*             | 1* |    |    |   |
| Walters, Bucky*          | 1  | 1  |    |   |
| Walters, Fred            |    | 2  | 1  |   |
| Walters, Jack*           | 1* |    |    |   |
| Wambsganss, Bill         | 1  |    |    |   |
| Waner, Lloyd             | 1  | 1  |    |   |
| Wasdell, Jimmy*          | 1  |    | 2* |   |
| Wasiak, Stan             | 1  |    | 1  |   |
| Watkins, Linville (Lin)* | 1* |    |    |   |
| Watkins, Tom             | 1  | 2  |    |   |
| Weatherly, Roy           | 1  | 1  | 1  | 1 |
| Wehmeier, Herm           | 1  |    |    | 1 |
| Weik, Dick               | 1  |    |    | 1 |
| Weiss, Sidney*           | 1* |    |    |   |
| Werber, Bill, Jr.*       | 3* | 1  | 1* |   |
| Wheat, Zach              | 1  | 2  |    |   |
| Whisenant, Pete          | 1  | 1  |    |   |
| White, Bill              | 2  |    |    |   |
| White, Ed                | 1  |    |    |   |
| White, Mike              | 2  |    |    |   |
| Whitman, Dick            | 1  |    |    | 1 |
| Wilhelm, Hoyt            | 2  | 4  |    |   |
| Wilks, Ted               | 1  | 1  |    |   |

|                           |    |   |    |   |
|---------------------------|----|---|----|---|
| Williams, Charlie*        | 1* |   |    |   |
| Williams, Davey           | 1  | 3 |    | 1 |
| Williams, Larry*          | 1* |   |    |   |
| Williams, Woody*          | 1* |   |    |   |
| Wilson, Bill              | 1  |   |    | 1 |
| Wilson, Jim               | 1  | 1 |    |   |
| Winford, Jim*             |    |   | 1* | 1 |
| Wise, Casey               | 1  | 2 |    |   |
| Wise, Hugh (Hughie)*      | 1* |   | 1* |   |
| Workman, Charlie (Chuck)* | 3* |   | 3* |   |
| Wyatt, Whitlow            | 2  | 6 |    |   |
| Wynn, Early               | 3  | 7 |    |   |
| Wyrostek, John            | 1  |   |    | 1 |
| York, Earl*               | 1* |   |    |   |
| York, Rudy                | 1  | 2 |    |   |
| Young, Babe*              | 2* |   | 1* |   |
| Zanni, Dom*               | 2* |   |    |   |
| Zarilla, Al               | 1  |   |    | 1 |
| Zauchin, Norm             | 1  |   |    | 1 |
| Zernia, Harvey*           | 2* | 1 |    |   |
| Zernial, Gus              | 1  |   |    |   |
| Zimmerman, Jerry          | 1  |   |    |   |
| Zinn, Jimmy               | 1  |   |    |   |
| Zoldak, Sam               | 1  |   |    |   |
| Zuverink, George          | 1  |   |    |   |
| Zwilling, Dutch           | 1  | 1 |    | 1 |
